# Supplementary material for: ERP Evidence for Co-Activation of English Words during Recognition of American Sign Language Signs
Source: MDPI journal article supplement (doi:10.3390/brainsci9060148), 2019-06-21

Supplementary Materials. Scatterplots of significant correlations between ERP effects and language measures at representative sites

Semantic (325-625 ms)

| Subject | ASL Production | Difference at FP1 |
|---------|----------------|-------------------|
| s1      | 0.83           | -0.98             |
| s2      | 0.87           | 0.56              |
| s3      | 0.77           | 0.71              |
| s4      | 0.8            | -3.78             |
| s5      | 0.83           | 1.4               |
| s6      | 0.83           | -1.53             |
| s7      | 0.83           | 1.28              |
| s8      | 0.83           | 0.72              |
| s9      | 0.9            | 1.76              |
| s10     | 0.8            | -0.45             |
| s11     | 0.77           | 0.16              |
| s12     | 0.93           | 2.57              |
| s13     | 0.77           | -2.48             |
| s14     | 0.87           | 0.16              |
| s15     | 0.8            | 1.13              |
| s16     | 0.77           | 0.37              |
| s17     | 0.83           | 2.19              |
| s18     | 0.83           | -1.72             |
| s19     | 0.7            | -4.2              |
| s20     | 0.83           | -0.24             |

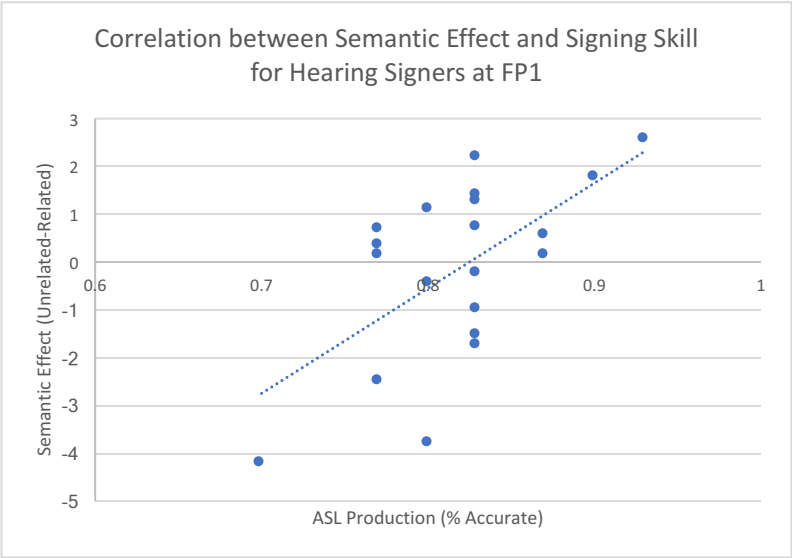

Rime (325-625 ms)

| Subject | ASL Comprehension | Difference at Pz |
|---------|-------------------|------------------|
| s1      | 8                 | -0.12            |
| s2      | 18                | -3.68            |
| s3      | 17                | -4.35            |
| s4      | 14                | 0.02             |
| s5      | 5                 | 3.4              |
| s6      | 16                | -0.9             |
| s7      | 14                | -1.48            |
| s8      | 10                | -0.05            |
| s9      | 17                | 0.05             |
| s10     | 23                | -5.17            |
| s11     | 11                | -0.17            |
| s12     | 22                | -0.37            |
| s13     | 11                | -0.52            |
| s14     | 24                | -4.56            |
| s15     | 20                | -2.06            |
| s16     | 17                | -1.3             |
| s17     | 15                | -0.24            |
| s18     | 12                | 3.92             |
| s19     | 11                | 0.69             |
| s20     | 11                | 1.98             |

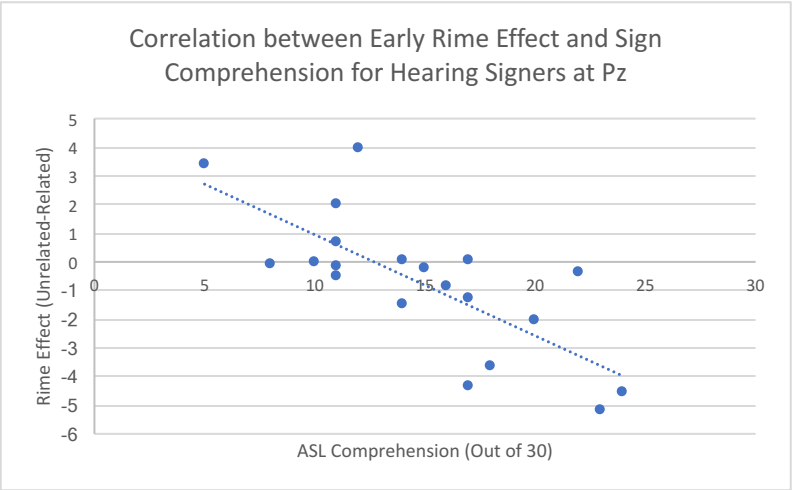

Rime (700-900 ms)

| Subject | ASL Comprehension | Difference at Pz |
|---------|-------------------|------------------|
| s1      | 8                 | -5.92            |
| s2      | 18                | -7.36            |
| s3      | 17                | -8.79            |
| s4      | 14                | -0.01            |
| s5      | 5                 | 3.7              |
| s6      | 16                | -6.59            |
| s7      | 14                | -5.04            |
| s8      | 10                | 2.58             |
| s9      | 17                | 1.29             |
| s10     | 23                | -7.51            |
| s11     | 11                | 0.16             |
| s12     | 22                | -5.73            |
| s13     | 11                | -6.46            |
| s14     | 24                | -9.21            |
| s15     | 20                | -9.5             |
| s16     | 17                | -1.3             |
| s17     | 15                | 2.1              |
| s18     | 12                | 0.76             |
| s19     | 11                | -2.08            |
| s20     | 11                | 2.18             |

Correlation between Late Rime Effect and Sign Comprehension in Hearing Signers at Pz

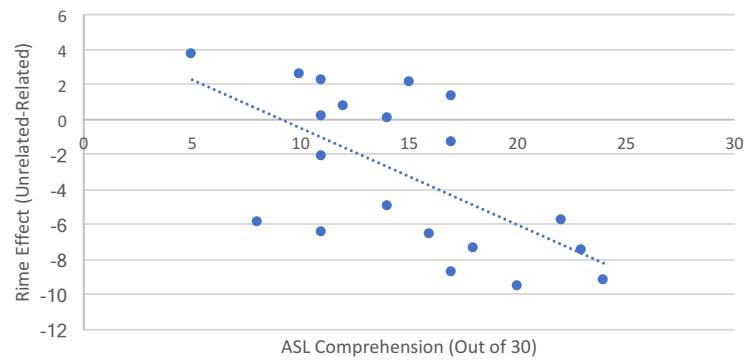

Rime (700-900 ms)

| Subject | English Spelling | Difference at P3 |
|---------|------------------|------------------|
| s1      | 78               | -3.38            |
| s2      | 81               | -5.85            |
| s3      | 82               | -6.59            |
| s4      | 73               | 2.95             |
| s5      | 79               | 3.27             |
| s6      | 83               | -8.22            |
| s7      | 80               | -5.02            |
| s8      | 73               | 1.1              |
| s9      | 79               | 1.06             |
| s10     | 80               | -1.4             |
| s11     | 76               | 0.36             |
| s12     | 85               | -5.26            |
| s13     | 75               | -4.97            |
| s14     | 83               | -6.87            |
| s15     | 83               | -6.38            |
| s16     | 79               | 0.12             |
| s17     | 80               | 1.16             |
| s18     | 80               | 1.3              |
| s19     | 78               | -1.91            |
| s20     | 73               | 2.26             |

Correlation between Late Rime Effect and English Spelling Skill in Hearing Signers at P3

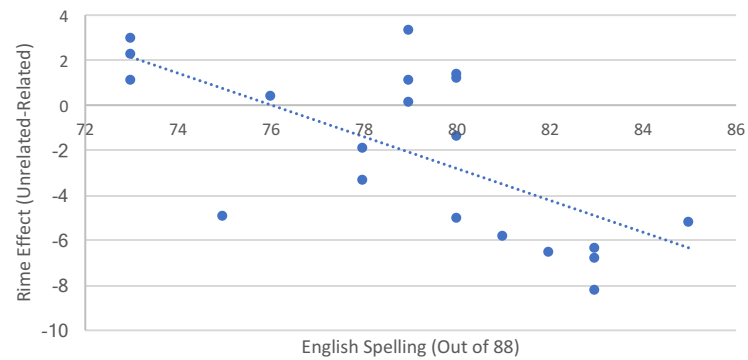

Supplement: s1 [file s1]
