# Supplementary material for: ERP Evidence for Co-Activation of English Words during Recognition of American Sign Language Signs
Source: MDPI journal article supplement (doi:10.3390/brainsci9060148), 2019-06-21
Supplement: s1 [file s1]

Supplementary Materials. Pearson Correlations with FDR-Adjusted  $p$  Values

Hearing Signers

|                       |                   |          | Prefrontal |        |        | Frontal |        |        | Central |        |        | Parietal |        |        | Occipital |        |        |
|-----------------------|-------------------|----------|------------|--------|--------|---------|--------|--------|---------|--------|--------|----------|--------|--------|-----------|--------|--------|
|                       |                   |          | FP1        | FPz    | FP2    | F3      | Fz     | F4     | C3      | Cz     | C4     | P3       | Pz     | P4     | O1        | Oz     | O2     |
| Semantic (325-625 ms) | English Spelling  | <i>r</i> | 0.431      | 0.328  | 0.371  | 0.244   | 0.117  | 0.174  | 0.148   | 0.131  | 0.143  | 0.275    | 0.252  | 0.217  | 0.411     | 0.381  | 0.311  |
|                       |                   | <i>p</i> | 0.401      | 0.453  | 0.401  | 0.498   | 0.624  | 0.624  | 0.624   | 0.624  | 0.624  | 0.624    | 0.498  | 0.498  | 0.539     | 0.401  | 0.401  |
|                       | ASL Comprehension | <i>r</i> | 0.284      | 0.289  | 0.193  | 0.393   | 0.246  | 0.212  | 0.363   | 0.306  | 0.216  | 0.443    | 0.380  | 0.361  | 0.502     | 0.460  | 0.438  |
|                       |                   | <i>p</i> | 0.305      | 0.305  | 0.415  | 0.221   | 0.370  | 0.396  | 0.221   | 0.305  | 0.396  | 0.203    | 0.221  | 0.221  | 0.203     | 0.203  | 0.203  |
|                       | ASL Production    | <i>r</i> | 0.608      | 0.601  | 0.588  | 0.542   | 0.548  | 0.508  | 0.444   | 0.454  | 0.431  | 0.336    | 0.348  | 0.289  | 0.410     | 0.368  | 0.272  |
|                       |                   | <i>p</i> | 0.030      | 0.030  | 0.030  | 0.042   | 0.042  | 0.055  | 0.094   | 0.094  | 0.097  | 0.171    | 0.166  | 0.231  | 0.108     | 0.150  | 0.246  |
| Rime (325-625 ms)     | English Spelling  | <i>r</i> | -0.091     | -0.163 | -0.284 | -0.201  | -0.148 | -0.314 | -0.343  | -0.334 | -0.411 | -0.468   | -0.406 | -0.426 | -0.342    | -0.384 | -0.357 |
|                       |                   | <i>p</i> | 0.704      | 0.569  | 0.305  | 0.494   | 0.570  | 0.267  | 0.252   | 0.252  | 0.252  | 0.252    | 0.252  | 0.252  | 0.252     | 0.252  | 0.252  |
|                       | ASL Comprehension | <i>r</i> | -0.311     | -0.409 | -0.492 | -0.109  | -0.331 | -0.444 | -0.240  | -0.492 | -0.619 | -0.543   | -0.745 | -0.681 | -0.502    | -0.678 | -0.575 |
|                       |                   | <i>p</i> | 0.209      | 0.100  | 0.047  | 0.646   | 0.193  | 0.075  | 0.330   | 0.047  | 0.015  | 0.033    | 0.000  | 0.005  | 0.047     | 0.005  | 0.024  |
|                       | ASL Production    | <i>r</i> | 0.221      | 0.107  | 0.029  | 0.296   | 0.330  | 0.171  | 0.127   | 0.123  | 0.008  | -0.125   | -0.005 | -0.036 | -0.154    | -0.202 | -0.291 |
|                       |                   | <i>p</i> | 0.889      | 0.889  | 0.982  | 0.889   | 0.889  | 0.889  | 0.889   | 0.889  | 0.982  | 0.889    | 0.982  | 0.982  | 0.889     | 0.889  | 0.889  |
| Rime (700-900 ms)     | English Spelling  | <i>r</i> | -0.048     | -0.232 | -0.318 | -0.341  | -0.378 | -0.436 | -0.520  | -0.554 | -0.510 | -0.662   | -0.604 | -0.535 | -0.635    | -0.594 | -0.554 |
|                       |                   | <i>p</i> | 0.840      | 0.348  | 0.198  | 0.176   | 0.136  | 0.083  | 0.036   | 0.028  | 0.037  | 0.015    | 0.023  | 0.032  | 0.023     | 0.023  | 0.028  |
|                       | ASL Comprehension | <i>r</i> | -0.065     | -0.183 | -0.227 | -0.155  | -0.313 | -0.348 | -0.317  | -0.477 | -0.468 | -0.514   | -0.625 | -0.512 | -0.568    | -0.595 | -0.544 |
|                       |                   | <i>p</i> | 0.785      | 0.507  | 0.419  | 0.551   | 0.244  | 0.220  | 0.244   | 0.071  | 0.071  | 0.053    | 0.045  | 0.053  | 0.045     | 0.045  | 0.049  |
|                       | ASL Production    | <i>r</i> | 0.134      | 0.089  | 0.049  | 0.245   | 0.250  | 0.222  | 0.046   | 0.108  | 0.056  | -0.095   | -0.009 | 0.009  | -0.103    | -0.130 | -0.179 |
|                       |                   | <i>p</i> | 0.970      | 0.970  | 0.970  | 0.970   | 0.970  | 0.970  | 0.970   | 0.970  | 0.970  | 0.970    | 0.970  | 0.970  | 0.970     | 0.970  | 0.970  |

Deaf Signers

|                       |          | Prefrontal |        |        | Frontal |        |        | Central |        |        | Parietal |        |        | Occipital |        |        |
|-----------------------|----------|------------|--------|--------|---------|--------|--------|---------|--------|--------|----------|--------|--------|-----------|--------|--------|
|                       |          | FP1        | FPz    | FP2    | F3      | Fz     | F4     | C3      | Cz     | C4     | P3       | Pz     | P4     | O1        | Oz     | O2     |
| Semantic (325-625 ms) | <i>r</i> | -0.139     | -0.038 | -0.090 | -0.209  | -0.200 | -0.071 | -0.297  | -0.121 | 0.044  | -0.207   | -0.079 | -0.020 | -0.064    | -0.060 | -0.061 |
|                       | <i>p</i> | 0.923      | 0.923  | 0.923  | 0.923   | 0.923  | 0.923  | 0.923   | 0.923  | 0.923  | 0.923    | 0.923  | 0.924  | 0.923     | 0.923  | 0.923  |
|                       | <i>r</i> | -0.020     | -0.122 | -0.133 | -0.058  | -0.066 | -0.055 | -0.041  | -0.046 | -0.061 | 0.089    | 0.083  | -0.005 | 0.163     | 0.227  | 0.180  |
|                       | <i>p</i> | 0.983      | 0.980  | 0.980  | 0.980   | 0.980  | 0.980  | 0.980   | 0.980  | 0.980  | 0.980    | 0.980  | 0.983  | 0.980     | 0.980  | 0.980  |
| Rime (325-625 ms)     | <i>r</i> | 0.161      | 0.200  | 0.191  | 0.074   | 0.084  | 0.150  | -0.116  | 0.062  | 0.191  | -0.041   | 0.053  | 0.080  | 0.027     | 0.143  | 0.133  |
|                       | <i>p</i> | 0.902      | 0.902  | 0.902  | 0.902   | 0.902  | 0.902  | 0.902   | 0.902  | 0.902  | 0.902    | 0.902  | 0.902  | 0.902     | 0.902  | 0.902  |
|                       | <i>r</i> | -0.409     | -0.252 | -0.205 | -0.373  | -0.350 | -0.268 | -0.225  | -0.244 | -0.215 | -0.103   | -0.204 | -0.130 | -0.048    | -0.096 | -0.130 |
|                       | <i>p</i> | 0.470      | 0.510  | 0.510  | 0.470   | 0.470  | 0.510  | 0.510   | 0.510  | 0.510  | 0.703    | 0.510  | 0.681  | 0.825     | 0.703  | 0.681  |
| Rime (700-900 ms)     | <i>r</i> | -0.101     | -0.122 | -0.011 | -0.177  | -0.244 | -0.138 | -0.230  | -0.168 | -0.109 | -0.066   | -0.168 | -0.058 | 0.005     | -0.095 | -0.049 |
|                       | <i>p</i> | 0.946      | 0.946  | 0.983  | 0.946   | 0.946  | 0.946  | 0.946   | 0.946  | 0.946  | 0.946    | 0.946  | 0.946  | 0.983     | 0.946  | 0.946  |
|                       | <i>r</i> | -0.146     | -0.047 | -0.028 | -0.157  | -0.173 | -0.114 | -0.118  | -0.010 | 0.072  | 0.074    | 0.087  | 0.142  | 0.168     | 0.184  | 0.242  |
|                       | <i>p</i> | 0.924      | 0.954  | 0.961  | 0.924   | 0.924  | 0.924  | 0.924   | 0.962  | 0.924  | 0.924    | 0.924  | 0.924  | 0.924     | 0.924  | 0.924  |
| Rime (700-900 ms)     | <i>r</i> | -0.078     | -0.113 | -0.042 | -0.202  | -0.291 | -0.144 | -0.369  | -0.417 | -0.357 | -0.443   | -0.464 | -0.407 | -0.420    | -0.402 | -0.424 |
|                       | <i>p</i> | 0.769      | 0.691  | 0.846  | 0.468   | 0.251  | 0.626  | 0.143   | 0.109  | 0.145  | 0.109    | 0.109  | 0.109  | 0.109     | 0.109  | 0.109  |
|                       | <i>r</i> | 0.039      | -0.074 | 0.018  | -0.004  | -0.135 | -0.035 | -0.184  | -0.177 | -0.104 | -0.265   | -0.310 | -0.168 | -0.236    | -0.229 | -0.147 |
|                       | <i>p</i> | 0.984      | 0.984  | 0.984  | 0.984   | 0.883  | 0.984  | 0.883   | 0.883  | 0.945  | 0.883    | 0.883  | 0.883  | 0.883     | 0.883  | 0.883  |
| Rime (700-900 ms)     | <i>r</i> | -0.075     | -0.184 | -0.211 | -0.161  | -0.312 | -0.305 | -0.299  | -0.318 | -0.262 | -0.221   | -0.237 | -0.195 | 0.008     | 0.005  | 0.001  |
|                       | <i>p</i> | 0.908      | 0.585  | 0.585  | 0.618   | 0.585  | 0.585  | 0.585   | 0.585  | 0.585  | 0.585    | 0.585  | 0.585  | 0.997     | 0.997  | 0.997  |
