# Supplementary material for: ERP Evidence for Co-Activation of English Words during Recognition of American Sign Language Signs
Source: MDPI journal article supplement (doi:10.3390/brainsci9060148), 2019-06-21
Supplement: s1 [file s1]

# Supplementary Materials. Glosses for ASL Video Stimuli

## Semantically Unrelated Prime-Target Pairs

|    | Non-Rime Prime | Rime Prime | Target |
|----|----------------|------------|--------|
| 1  | MY             | HAT        | BAT    |
| 2  | RULE           | GLASS      | GRASS  |
| 3  | SORRY          | FINE       | NINE   |
| 4  | FLAG           | FLOOR      | POOR   |
| 5  | SILLY          | BALLOON    | NOON   |
| 6  | SHOES          | HEAD       | BREAD  |
| 7  | USE            | STUCK      | DUCK   |
| 8  | LAW            | TREE       | SEE    |
| 9  | WHERE          | FULL       | BULL   |
| 10 | EYE            | PLAIN      | TRAIN  |
| 11 | NEVER          | BELL       | SPELL  |
| 12 | HUNT           | BLINK      | PINK   |
| 13 | WORK           | LINE       | WINE   |
| 14 | ROOM           | CLOCK      | SOCK   |
| 15 | SIGN           | THIN       | WIN    |
| 16 | NOW            | WOOD       | HOOD   |
| 17 | VOICE          | BALL       | FALL   |
| 18 | WHY            | CUT        | NUT    |
| 19 | BODY           | COAT       | GOAT   |
| 20 | STAFF          | BOX        | FOX    |
| 21 | AND            | ARM        | FARM   |
| 22 | PIPE           | THINK      | WINK   |
| 23 | OWL            | SHAVE      | SLAVE  |
| 24 | YES            | MEET       | SWEET  |
| 25 | BAD            | SHY        | DRY    |
| 26 | ROSE           | TEAR       | YEAR   |
| 27 | SEW            | FIND       | KIND   |
| 28 | DENY           | SLEEP      | SHEEP  |
| 29 | PAPER          | TIE        | LIE    |
| 30 | WHICH          | KITE       | BITE   |
| 31 | BRIDGE         | PLACE      | FACE   |
| 32 | ROOSTER        | GRAPE      | SHAPE  |
| 33 | TIME           | GREEN      | QUEEN  |
| 34 | SURF           | FIX        | SIX    |
| 35 | WHALE          | GATE       | HATE   |
| 36 | SON            | SNEEZE     | FREEZE |
| 37 | DARK           | BAKE       | TAKE   |
| 38 | PAINT          | MATH       | BATH   |
| 39 | NURSE          | BAR        | STAR   |
| 40 | CHEESE         | MOUSE      | HOUSE  |
| 41 | FIRST          | BLOW       | KNOW   |
| 42 | FISH           | CLOWN      | DOWN   |
| 43 | HOME           | LEARN      | EARN   |
| 44 | TRASH          | SAME       | GAME   |
| 45 | GAS            | WET        | BET    |
| 46 | WATCH          | BEER       | DEER   |
| 47 | MOUTH          | TAN        | PLAN   |

Semantically Related Prime-Target Pairs

|   | Non-Rime Prime | Rime Prime | Target |
|---|----------------|------------|--------|
| 1 | BIRD           | RAT        | CAT    |
| 2 | UPSET          | MAD        | SAD    |
| 3 | FOUR           | ELEVEN     | SEVEN  |
| 4 | ONION          | TOMATO     | POTATO |

|    | Non-Rime Prime | Non-Rime Prime | Target  |
|----|----------------|----------------|---------|
| 5  | GOLF           | TENNIS         | SOCCER  |
| 6  | YAWN           | TIRED          | NIGHT   |
| 7  | DOCTOR         | COUGH          | SICK    |
| 8  | PIANO          | FLUTE          | HARP    |
| 9  | COOKIE         | COW            | MILK    |
| 10 | MOVIE          | FAMOUS         | ACTOR   |
| 11 | WOLF           | HORSE          | PIG     |
| 12 | EAST           | WEST           | SOUTH   |
| 13 | WRITE          | STUDY          | READ    |
| 14 | FIGHT          | PEACE          | WAR     |
| 15 | TIGER          | BEAR           | LION    |
| 16 | SNOB           | MONEY          | RICH    |
| 17 | MARRY          | KISS           | LOVE    |
| 18 | ALL            | SOME           | HALF    |
| 19 | EAGLE          | TURKEY         | CHICKEN |
| 20 | ASIA           | JAPAN          | CHINA   |
| 21 | FUN            | GIFT           | PARTY   |
| 22 | LAUGH          | SMILE          | HAPPY   |
| 23 | SISTER         | BOY            | GIRL    |
| 24 | STORY          | PAGE           | BOOK    |
| 25 | COFFEE         | TEA            | WATER   |
| 26 | HOUR           | MONTH          | WEEK    |
| 27 | DROWN          | DIVE           | SWIM    |
| 28 | TEACH          | GRADE          | CLASS   |
| 29 | CORN           | SALAD          | CARROT  |
| 30 | BLOOD          | LUNG           | HEART   |
| 31 | ROYAL          | KING           | CROWN   |
| 32 | ANGEL          | HELL           | HEAVEN  |
| 33 | AUNT           | UNCLE          | FAMILY  |
| 34 | COOL           | RAIN           | WIND    |
| 35 | ORANGE         | BANANA         | APPLE   |
| 36 | BALD           | COMB           | HAIR    |
| 37 | SHELF          | CHAIR          | TABLE   |
| 38 | EARTH          | MOUNTAIN       | LAND    |
| 39 | EGYPT          | INDIA          | ITALY   |
| 40 | WHO            | WHEN           | WHAT    |
| 41 | IN             | ON             | UNDER   |
| 42 | BORN           | CRAWL          | BABY    |
| 43 | EAT            | EGG            | TOAST   |
| 44 | COOK           | LUNCH          | HUNGRY  |
| 45 | WORD           | CLICK          | TYPE    |
| 46 | DOLL           | KID            | PLAY    |
| 47 | STOP           | FINISH         | START   |
