# Supplementary material for: ERP Evidence for Co-Activation of English Words during Recognition of American Sign Language Signs
Source: Brain Sci. 2019 Jun 21;9(6):148. doi: 10.3390/brainsci9060148 (PMC6627215; doi:10.3390/brainsci9060148)
Supplement: Supplementary file 1 [file brainsci-09-00148-s001.zip]

Archive with 4 entries (4 files):
- Table S1.pdf
- Table S2.pdf
- Table S3.pdf
- Table S4.pdf
